# Supplementary material for: Occurrence and Identification of Yeasts in Production of White-Brined Cheese
Source: Microorganisms. 2022 May 24;10(6):1079. doi: 10.3390/microorganisms10061079 (PMC9228510; doi:10.3390/microorganisms10061079)
Supplement: Supplementary file 1 [file microorganisms-10-01079-s001.zip › microorganisms-1741097-supplementary.pdf]

Table S1. Fermentation and assimilation of carbohydrates by *Kluyveromyces* spp. isolates from production line of white-brined cheese

| Isolate Code                            | Fermentation of carbohydrates <sup>a</sup> |          |         |         |         |          | Assimilation of carbohydrates <sup>b</sup> |          |         |         |         |          |
|-----------------------------------------|--------------------------------------------|----------|---------|---------|---------|----------|--------------------------------------------|----------|---------|---------|---------|----------|
|                                         | Glucose                                    | Galactos | Sucrose | Maltose | Lactose | Raffinos | Glucose                                    | Galactos | Sucrose | Maltose | Lactose | Raffinos |
| T2-5                                    | +                                          | +        | +       | -       | +       | w        | +                                          | +        | +       | +       | +       | +        |
| T2-10                                   | +                                          | +        | +       | -       | +       | w        | +                                          | +        | +       | +       | +       | +        |
| T2-22                                   | +                                          | +        | +       | -       | +       | w        | +                                          | +        | +       | +       | +       | +        |
| T2-27                                   | +                                          | +        | +       | -       | +       | w        | +                                          | +        | +       | +       | +       | +        |
| T2-28                                   | +                                          | +        | +       | -       | +       | w        | +                                          | +        | +       | +       | +       | +        |
| T2-29                                   | +                                          | +        | +       | -       | +       | w        | +                                          | +        | +       | +       | +       | +        |
| <i>Kluyveromyces lactis</i> CBS 845     | +                                          | +        | +       | +       | +       | w        | +                                          | +        | +       | +       | +       | +        |
| <i>Kluyveromyces marxianus</i> CBS 1553 | +                                          | +        | +       | -       | +       | w        | +                                          | +        | +       | +       | +       | +        |

<sup>a</sup> Results are given as + (strongly positive, Durham tube filled with air within 7 days), l (delayed positive, Durham tube filled quickly after 7 days), s (slow positive, Durham tube filled slowly after 7 days), w (weakly positive, under 1/3 of the Durham tube is filled with air), and – (negative, no production of air).

<sup>b</sup> Results are given as + (positive, 2+ or 3+ on Wickerhams card after 1 week), l (delayed positive, 2+ or 3+ on Wickerhams card after 2 weeks), s (slow positive, 2+ or 3+ on Wickerhams card in up to 4 weeks), w (weak positive, 1+ on Wickerhams card), and – (negative, no growth).
